# Supplementary material for: Sequence variants in the autophagy gene IRGM and multiple other replicating loci contribute to Crohn's disease susceptibility
Source: Springer Nature journal article supplement (doi:10.1038/ng2061), 2007-06-06
Supplement: 41588_2007_BFng2061_MOESM64_ESM.pdf [file 41588_2007_BFng2061_MOESM64_ESM.pdf]

**SUPPLEMENTARY TABLE 1: Details of Crohn cases**

|                         | WTCCC panel<br>n = 1748 | Replication panel<br>n = 1182 |
|-------------------------|-------------------------|-------------------------------|
| Median age              | 45.7 years              | 43.9 years                    |
| Median age at diagnosis | 26.1 years              | 25.5 years                    |
| Gender - female: male   | 1.55:1                  | 1.48:1                        |
|                         |                         |                               |
| Jewish ancestry         | 1.75%                   | 1.03%                         |
|                         |                         |                               |
| Location                | 33.1% ileal             | 38.1% ileal                   |
|                         | 31.2% colonic           | 29.6% colonic                 |
|                         | 35.7% ileo-colonic      | 32.3% ileo-colonic            |
|                         | 27.8% perianal          | 23.8% perianal                |
|                         |                         |                               |
| Behaviour               | 45.6% inflammatory      | 40.2% inflammatory            |
|                         | 37.0% stenosing         | 38.7% stenosing               |
|                         | 17.5% penetrating       | 21.2% penetrating             |

Demographic details and disease phenotypes for cases included in the WTCCC study and the current replication study.
