# Supplementary material for: Sequence variants in the autophagy gene IRGM and multiple other replicating loci contribute to Crohn's disease susceptibility
Source: Springer Nature journal article supplement (doi:10.1038/ng2061), 2007-06-06
Supplement: 41588_2007_BFng2061_MOESM65_ESM.pdf [file 41588_2007_BFng2061_MOESM65_ESM.pdf]

## SUPPLEMENTARY TABLE 2: SNPs with converging allele frequencies

| SNP        | Chr | Pos(Mb) | WTCCC p   | WTCD  | RCD   | WTU1  | WTU2  |
|------------|-----|---------|-----------|-------|-------|-------|-------|
| rs2484676  | 1   | 50.6    | 0.0001882 | 0.512 | 0.494 | 0.472 | 0.485 |
| rs11205760 | 1   | 50.9    | 1.67E-05  | 0.307 | 0.317 | 0.351 | 0.338 |
| rs4506508  | 1   | 77      | 0.0001148 | 0.204 | 0.190 | 0.172 | 0.181 |
| rs2814036  | 1   | 164     | 0.0001503 | 0.024 | 0.023 | 0.014 | 0.016 |
| rs17419032 | 1   | 197.7   | 7.50E-05  | 0.268 | 0.273 | 0.306 | 0.297 |
| rs363617   | 2   | 74.8    | 0.0002298 | 0.15  | 0.141 | 0.123 | 0.139 |
| rs2322659  | 2   | 136.4   | 0.001851  | 0.221 | 0.222 | 0.194 | 0.191 |
| rs9870678  | 3   | 57.5    | 3.67E-05  | 0.417 | 0.393 | 0.374 | 0.389 |
| rs1462651  | 3   | 149.2   | 8.42E-05  | 0.136 | 0.194 | 0.167 | 0.154 |
| rs9993022  | 4   | 59.8    | 0.0001554 | 0.029 | 0.024 | 0.017 | 0.02  |
| rs1363670  | 5   | 158.7   | 3.19E-05  | 0.138 | 0.159 | 0.17  | 0.168 |
| rs17309827 | 6   | 3.4     | 3.30E-05  | 0.333 | 0.344 | 0.375 | 0.366 |
| rs12529198 | 6   | 5.1     | 1.65E-05  | 0.074 | 0.073 | 0.053 | 0.062 |
| rs6908425  | 6   | 20.8    | 5.13E-06  | 0.19  | 0.202 | 0.23  | 0.218 |
| rs6927210  | 6   | 138.1   | 9.05E-06  | 0.529 | 0.494 | 0.482 | 0.492 |
| rs946227   | 6   | 138.1   | 1.31E-05  | 0.325 | 0.356 | 0.369 | 0.357 |
| rs1558043  | 7   | 19.8    | 0.0003365 | 0.135 | 0.132 | 0.11  | 0.119 |
| rs12704036 | 7   | 147.7   | 1.98E-05  | 0.264 | 0.301 | 0.305 | 0.288 |
| rs4871612  | 8   | 126.6   | 2.58E-05  | 0.184 | 0.187 | 0.22  | 0.208 |
| rs3936503  | 10  | 35.6    | 1.60E-05  | 0.344 | 0.356 | 0.301 | 0.319 |
| rs10761659 | 10  | 64.1    | 2.68E-07  | 0.406 | 0.442 | 0.461 | 0.456 |
| rs7081330  | 10  | 101.3   | 1.80E-06  | 0.339 | 0.361 | 0.388 | 0.384 |
| rs1931047  | 13  | 92.1    | 0.009975  | 0.02  | 0.023 | 0.013 | 0.017 |
| rs916977   | 15  | 26.2    | 0.001596  | 0.165 | 0.156 | 0.14  | 0.147 |
| rs9895062  | 17  | 9.3     | 0.0002114 | 0.066 | 0.063 | 0.048 | 0.052 |

Allele frequencies for 25 SNPs genotyped in 1182 cases from the replication Crohn disease panel (RCD) showing convergence with frequencies from WTCCC Unaffected case samples (WTU2) (coronary artery disease, hypertension and bipolar disorder cohorts when compared to the significant difference between the original WTCCC Crohn Disease samples (WTCD) and WTCCC Unaffected control samples (WTU1). Quoted p-values are for the final, clean WTCCC dataset<sup>1</sup>. Some SNPs with  $p > 10^{-4}$  in this table showed stronger evidence in the preliminary data from which we fast-tracked them for follow-up.

### Reference

1. Wellcome Trust Case Control Consortium, *Nature*, in press (2007)
