# Supplementary material for: Sequence variants in the autophagy gene IRGM and multiple other replicating loci contribute to Crohn's disease susceptibility
Source: Springer Nature journal article supplement (doi:10.1038/ng2061), 2007-06-06
Supplement: 41588_2007_BFng2061_MOESM66_ESM.pdf [file 41588_2007_BFng2061_MOESM66_ESM.pdf]

### SUPPLEMENTARY TABLE 3: SNP genotype call rates

| SNP        | Missing data cases | Missing data controls | p HWE    |
|------------|--------------------|-----------------------|----------|
| rs2484676  | 0.08968            | NA                    | 0.3004   |
| rs11205760 | 0.1168             | NA                    | 0.8304   |
| rs4506508  | 0.1083             | NA                    | 0.3011   |
| rs2814036  | 0.06176            | NA                    | 0.1105   |
| rs12035082 | 0.05161            | 0.08696               | 0.903    |
| rs10801047 | 0.1252             | 0.02767               | 0.03348  |
| rs17419032 | 0.1261             | NA                    | 1        |
| rs363617   | 0.08799            | NA                    | 0.005125 |
| rs2322659  | 0.1193             | NA                    | 0.5904   |
| rs9858542  | 0.1328             | 0.07065               | 0.03211  |
| rs9870678  | 0.1269             | NA                    | 0.6901   |
| rs1462651  | 0.1100             | NA                    | 0.6761   |
| rs9993022  | 0.2132             | NA                    | 0.4204   |
| rs17234657 | 0.05668            | 0.08449               | 0.009521 |
| rs9292777  | 0.07783            | 0.1052                | 0.2744   |
| rs10077785 | 0.04653            | 0.126                 | 0.116    |
| rs13361189 | 0.1159             | 0.1196                | 0.5228   |
| rs4958847  | 0.08545            | 0.02668               | 1        |
| rs1363670  | 0.1125             | NA                    | 0.5607   |
| rs6887695  | 0.08883            | 0.1428                | 0.455    |
| rs17309827 | 0.1582             | NA                    | 0.8854   |
| rs12529198 | 0.1176             | NA                    | 0.8169   |
| rs6908425  | 0.08968            | NA                    | 0.4938   |
| rs6927210  | 0.07783            | NA                    | 0.4677   |
| rs946227   | 0.1151             | NA                    | 0.6353   |
| rs1558043  | 0.08037            | NA                    | 0.1331   |
| rs12704036 | 0.1041             | NA                    | 0.4183   |
| rs4871612  | 0.05668            | NA                    | 0.09334  |
| rs3936503  | 0.08037            | NA                    | 0.6359   |
| rs10761659 | 0.0423             | NA                    | 0.07061  |
| rs7081330  | 0.1015             | NA                    | 0.1086   |
| rs10883365 | 0.1311             | 0.1259                | 0.3358   |
| rs1931047  | 0.0643             | NA                    | 0.4456   |
| rs916977   | 0.09052            | NA                    | 0.04415  |
| rs9895062  | 0.1024             | NA                    | 0.1845   |
| rs2542151  | 0.1049             | 0.1215                | 0.5582   |
| rs2836754  | 0.0753             | 0.1146                | 0.7498   |

Fraction of replication cases and controls (where applicable) with null genotype calls and HWE p value for replication cases for each of 37 genotyped SNPs.
