# Supplementary material for: Sequence variants in the autophagy gene IRGM and multiple other replicating loci contribute to Crohn's disease susceptibility
Source: Springer Nature journal article supplement (doi:10.1038/ng2061), 2007-06-06
Supplement: 41588_2007_BFng2061_MOESM67_ESM.pdf [file 41588_2007_BFng2061_MOESM67_ESM.pdf]

#### SUPPLEMENTARY TABLE 4: SNP genotype counts

| SNP        | WTCD        | RCD         | WTU1          | WTU2           | RU          |
|------------|-------------|-------------|---------------|----------------|-------------|
| Rs2484676  | 453/884/410 | 271/521/284 | 679/1414/843  | 1376/2810/1550 | NA          |
| Rs11205760 | 175/721/847 | 106/449/489 | 376/1309/1249 | 643/2589/2501  | NA          |
| Rs4506508  | 79/555/1112 | 32/337/685  | 105/797/2031  | 176/1721/3840  | NA          |
| Rs2814036  | 2/81/1664   | 2/47/1060   | 0/80/2854     | 0/187/5551     | NA          |
| Rs12035082 | 330/871/546 | 205/552/364 | 433/1415/1086 | 899/2754/2088  | 289/892/667 |
| Rs10801047 | 18/278/1451 | 18/188/828  | 14/367/2549   | 26/773/4937    | 15/271/1682 |
| Rs17419032 | 130/674/941 | 77/409/547  | 286/1228/1423 | 455/2507/2782  | NA          |
| Rs363617   | 46/432/1269 | 33/237/808  | 45/633/2260   | 116/1366/4263  | NA          |
| Rs2322659  | 99/573/1074 | 53/357/631  | 126/884/1926  | 225/1742/3773  | NA          |
| Rs9858542  | 217/721/809 | 122/420/483 | 218/1216/1497 | 523/2273/2938  | 167/761/953 |
| Rs9870678  | 304/848/594 | 165/482/385 | 415/1361/1155 | 882/2701/2154  | NA          |
| Rs1462651  | 30/416/1300 | 81/247/724  | 84/811/2040   | 139/1491/4110  | NA          |
| Rs9993022  | 0/100/1648  | 1/43/886    | 0/100/2833    | 2/224/5517     | NA          |
| Rs17234657 | 62/506/1176 | 37/262/816  | 51/629/2253   | 95/1323/4317   | 41/408/1404 |
| Rs9292777  | 193/732/820 | 128/467/495 | 468/1375/1090 | 869/2750/2118  | 289/869/653 |
| Rs10077785 | 66/538/1143 | 55/346/726  | 164/1046/1725 | 339/2089/3313  | 91/639/1039 |
| Rs13361189 | 10/322/1409 | 14/198/833  | 5/384/2538    | 28/847/4853    | 21/245/1516 |
| Rs4958847  | 43/428/1275 | 27/288/766  | 43/580/2314   | 85/1244/4413   | 49/413/1518 |
| Rs1363670  | 35/411/1302 | 24/294/759  | 85/829/2023   | 171/1583/3989  | NA          |
| Rs6887695  | 189/817/734 | 134/467/394 | 278/1303/1343 | 566/2462/2691  | 164/774/797 |
| Rs17309827 | 182/797/767 | 127/463/453 | 416/1371/1151 | 760/2683/2298  | NA          |
| Rs12529198 | 3/253/1487  | 6/146/929   | 3/303/2623    | 7/694/5028     | NA          |
| Rs6908425  | 55/553/1139 | 39/357/680  | 165/1018/1749 | 255/1985/3494  | NA          |
| Rs6927210  | 487/875/386 | 272/533/285 | 674/1477/782  | 1387/2866/1481 | NA          |
| Rs946227   | 188/757/800 | 135/474/437 | 412/1343/1177 | 712/2675/2349  | NA          |
| Rs1558043  | 44/384/1316 | 15/257/815  | 32/583/2320   | 79/1210/4450   | NA          |
| Rs12704036 | 111/700/936 | 101/436/522 | 269/1251/1413 | 473/2364/2900  | NA          |
| Rs4871612  | 61/521/1166 | 30/357/728  | 137/1019/1779 | 252/1883/3603  | NA          |
| Rs3936503  | 203/795/749 | 140/493/454 | 261/1246/1430 | 554/2550/2638  | NA          |
| Rs10761659 | 293/832/622 | 236/528/368 | 630/1443/860  | 1225/2785/1730 | NA          |
| Rs7081330  | 207/767/769 | 150/467/445 | 409/1454/1068 | 827/2728/2157  | NA          |
| Rs10883365 | 507/865/376 | 289/497/241 | 651/1500/785  | 1343/2926/1471 | 370/815/427 |
| Rs1931047  | 0/71/1673   | 1/49/1056   | 1/77/2859     | 2/193/5549     | NA          |
| Rs916977   | 48/479/1221 | 38/260/777  | 57/710/2167   | 144/1400/4196  | NA          |
| Rs9895062  | 0/228/1509  | 7/120/934   | 0/281/2639    | 1/591/5109     | NA          |
| Rs2542151  | 83/561/1102 | 37/341/680  | 77/803/2055   | 148/1630/3958  | 55/513/1210 |
| Rs2836754  | 283/825/634 | 166/513/414 | 373/1326/1232 | 703/2609/2421  | 221/826/745 |

Genotype counts (minor homozygote, heterozygote, major homozygote) for 37 SNPs followed up in this study. WTCD: WTCCC Crohn disease samples. RCD: Replication Crohn samples. WTU1: WTCCC Controls. WTU2: WTCCC additional samples. RU: Replication controls.
