# Supplementary material for: Sequence variants in the autophagy gene IRGM and multiple other replicating loci contribute to Crohn's disease susceptibility
Source: Springer Nature journal article supplement (doi:10.1038/ng2061), 2007-06-06
Supplement: 41588_2007_BFng2061_MOESM68_ESM.pdf [file 41588_2007_BFng2061_MOESM68_ESM.pdf]

**Supplementary Table 5: IRGM re-sequencing primers**

| <b>Exon</b> | <b>Forward primer</b>      | <b>Reverse primer</b>    |
|-------------|----------------------------|--------------------------|
| 1.1         | 5'-GCCAGGATGGTCTCAATCTC    | 5'-GCAGATGCAACCATGATGAA  |
| 1.2         | 5'-CCCTTCGAAACACAGGACAT    | 5'-CCTTCTGCACCAGGTGTGTT  |
| 2           | 5'-CGGGTGACCTAAATAACCACT   | 5'-GCCTCACAAAGTTAGGAAGCA |
| 3           | 5'-TTAGTCTGGCCAGGCACTGT    | 5'-TGAGCTGTGACCCACACTATG |
| 4           | 5'-TGCCTCAGTCACTGTTTTGC    | 5'-TGATGAGACCCCACTTTTTCA |
| 5           | 5'-CCCATGTCTGCTACAGAACTTTT | 5'-TGGATTCCTCTGTATTCCACA |
