# Supplementary material for: Sequence variants in the autophagy gene IRGM and multiple other replicating loci contribute to Crohn's disease susceptibility
Source: Springer Nature journal article supplement (doi:10.1038/ng2061), 2007-06-06
Supplement: 41588_2007_BFng2061_MOESM69_ESM.pdf [file 41588_2007_BFng2061_MOESM69_ESM.pdf]

**SUPPLEMENTARY TABLE 6: Association with Crohn disease subphenotypes**

|            | Subphenotype P-values |              |                      |                        |                     |                       |                |              |
|------------|-----------------------|--------------|----------------------|------------------------|---------------------|-----------------------|----------------|--------------|
|            | Pure Ileal            | Pure Colonic | Perianal Involvement | Inflammatory Behaviour | Stenosing Behaviour | Penetrating Behaviour | Smoking Status | Age at Onset |
| rs11805303 | 0.970                 | 0.457        | 0.071                | 0.079                  | 0.147               | 0.586                 | 0.240          | 0.626        |
| rs12035082 | 0.363                 | 0.175        | 0.400                | 0.121                  | 0.087               | 0.498                 | 0.911          | 0.555        |
| rs10801047 | 0.719                 | 0.158        | 0.125                | 0.247                  | 0.929               | 0.204                 | 0.194          | 0.642        |
| rs10210302 | 0.458                 | 0.024        | 0.667                | <b>0.0003</b>          | 0.005               | 0.125                 | 0.374          | 0.019        |
| rs17234657 | 0.104                 | 0.058        | 0.863                | 0.077                  | 0.882               | 0.092                 | 0.768          | 0.904        |
| rs9292777  | 0.049                 | 0.143        | 0.252                | 0.370                  | 0.026               | 0.175                 | 0.580          | 0.794        |
| rs10077785 | 0.108                 | 0.990        | 0.230                | 0.698                  | 0.634               | 0.606                 | 0.683          | 0.770        |
| rs13361189 | 0.876                 | 0.448        | 0.436                | 0.512                  | 0.847               | 0.260                 | 0.505          | 0.952        |
| rs4958847  | 0.466                 | 0.162        | 0.200                | 0.416                  | 0.994               | 0.116                 | 0.561          | 0.570        |
| rs6887695  | 0.463                 | 0.425        | 0.326                | 0.468                  | 0.277               | 0.024                 | 0.656          | 0.504        |
| rs2542151  | 0.329                 | 0.290        | 0.763                | 0.050                  | 0.080               | 0.307                 | 0.277          | 0.387        |
| rs2836754  | 0.961                 | 0.810        | 0.946                | 0.285                  | 0.765               | 0.093                 | 0.187          | 0.059        |

Within-cases test of association for 6 CD sub-phenotypes and 2 modifiers (smoking status and age at onset). The behavioural phenotypes (inflammatory, stenosing and penetrating) were mutually exclusive. Smoking status was defined as ever smoked or never smoked. Only one association remained significant following Bonferroni correction (shown in bold). Tests of association calculated using the Cochran-Armitage trend test.
