# Supplementary material for: Sequence variants in the autophagy gene IRGM and multiple other replicating loci contribute to Crohn's disease susceptibility
Source: Springer Nature journal article supplement (doi:10.1038/ng2061), 2007-06-06
Supplement: 41588_2007_BFng2061_MOESM71_ESM.pdf [file 41588_2007_BFng2061_MOESM71_ESM.pdf]

**Supplementary Note: Wellcome Trust Case Control Consortium (WTCCC)  
Authors**

**Management Committee:** Paul R Burton<sup>1</sup>, David G Clayton<sup>2</sup>, Lon R Cardon<sup>3</sup>, Nick Craddock<sup>4</sup>, Panos Deloukas<sup>5</sup>, Audrey Duncanson<sup>6</sup>, Dominic P Kwiatkowski<sup>3,5</sup>, Mark I McCarthy<sup>3,7</sup>, Willem H Ouwehand<sup>8,9</sup>, Nilesh J Samani<sup>10</sup>, John A Todd<sup>2</sup>, Peter Donnelly (Chair)<sup>11</sup>

**Analysis Committee:** Jeffrey C Barrett<sup>3</sup>, Paul R Burton<sup>1</sup>, Dan Davison<sup>11</sup>, Peter Donnelly<sup>11</sup>, Doug Easton<sup>12</sup>, David Evans<sup>3</sup>, Hin-Tak Leung<sup>2</sup>, Jonathan L Marchini<sup>11</sup>, Andrew P Morris<sup>3</sup>, Chris CA Spencer<sup>11</sup>, Martin D Tobin<sup>1</sup>, Lon R Cardon (Co-chair)<sup>3</sup>, David G Clayton (Co-chair)<sup>2</sup>

**UK Blood Services & University of Cambridge Controls:** Antony P Attwood<sup>5,8</sup>, James P Boorman<sup>8,9</sup>, Barbara Cant<sup>8</sup>, Ursula Everson<sup>13</sup>, Judith M Hussey<sup>14</sup>, Jennifer D Jolley<sup>8</sup>, Alexandra S Knight<sup>8</sup>, Kerstin Koch<sup>8</sup>, Elizabeth Meech<sup>15</sup>, Sarah Nutland<sup>2</sup>, Christopher V Prowse<sup>16</sup>, Helen E Stevens<sup>2</sup>, Niall C Taylor<sup>8</sup>, Graham R Walters<sup>17</sup>, Neil M Walker<sup>2</sup>, Nicholas A Watkins<sup>8,9</sup>, Thilo Winzer<sup>8</sup>, John A Todd<sup>2</sup>, Willem H Ouwehand<sup>8,9</sup>

**1958 Birth Cohort Controls:** Richard W Jones<sup>18</sup>, Wendy L McArdle<sup>18</sup>, Susan M Ring<sup>18</sup>, David P Strachan<sup>19</sup>, Marcus Pembrey<sup>18,20</sup>

**Bipolar Disorder (Aberdeen):** Gerome Breen<sup>21</sup>, David St Clair<sup>21</sup>;

**(Birmingham):** Sian Caesar<sup>22</sup>, Katherine Gordon-Smith<sup>22,23</sup>, Lisa Jones<sup>22</sup>;

**(Cardiff):** Christine Fraser<sup>23</sup>, Elaine K Green<sup>23</sup>, Detelina Grozeva<sup>23</sup>, Marian L Hamshere<sup>23</sup>, Peter A Holmans<sup>23</sup>, Ian R Jones<sup>23</sup>, George Kirov<sup>23</sup>, Valentina Moskvina<sup>23</sup>, Ivan Nikolov<sup>23</sup>, Michael C O'Donovan<sup>23</sup>, Michael J Owen<sup>23</sup>, Nick Craddock<sup>23</sup>; **(London):** David A Collier<sup>24</sup>, Amanda Elkin<sup>24</sup>, Anne Farmer<sup>24</sup>, Richard Williamson<sup>24</sup>, Peter McGuffin<sup>24</sup>; **(Newcastle):** Allan H Young<sup>25</sup>, I Nicol Ferrier<sup>25</sup>

**Coronary Artery Disease (Leeds):** Stephen G Ball<sup>26</sup>, Anthony J Balmforth<sup>26</sup>, Jennifer H Barrett<sup>26</sup>, D Timothy Bishop<sup>26</sup>, Mark M Iles<sup>26</sup>, Azhar Maqbool<sup>26</sup>, Nadira Yuldasheva<sup>26</sup>, Alistair S Hall<sup>26</sup>; **(Leicester):** Peter S Braund<sup>10</sup>, Paul R Burton<sup>1</sup>, Richard J Dixon<sup>10</sup>, Massimo Mangino<sup>10</sup>, Suzanne Stevens<sup>10</sup>, Martin D Tobin<sup>1</sup>, John R Thompson<sup>1</sup>, Nilesh J Samani<sup>10</sup>

**Crohn Disease (Cambridge):** Francesca Bredin<sup>27</sup>, Mark Tremelling<sup>27</sup>, Miles Parkes<sup>27</sup>; **(Edinburgh):** Hazel Drummond<sup>28</sup>, Charles W Lees<sup>28</sup>, Elaine R Nimmo<sup>28</sup>, Jack Satsangi<sup>28</sup>; **(London):** Sheila A Fisher<sup>29</sup>, Alastair Forbes<sup>30</sup>, Cathryn M Lewis<sup>29</sup>, Clive M Onnie<sup>29</sup>, Natalie J Prescott<sup>29</sup>, Jeremy Sanderson<sup>31</sup>, Christopher G Mathew<sup>29</sup>; **(Newcastle):** Jamie Barbour<sup>32</sup>, M Khalid Mohiuddin<sup>32</sup>, Catherine E Todhunter<sup>32</sup>, John C Mansfield<sup>32</sup>; **(Oxford):** Tariq Ahmad<sup>33</sup>, Fraser R Cummings<sup>33</sup>, Derek P Jewell<sup>33</sup>

**Hypertension (Aberdeen):** John Webster<sup>34</sup>; **(Cambridge):** Morris J Brown<sup>35</sup>, David G Clayton<sup>2</sup>; **(Evry, France):** G Mark Lathrop<sup>36</sup>; **(Glasgow):** John Connell<sup>37</sup>, Anna Dominiczak<sup>37</sup>; **(Leicester):** Nilesh J Samani<sup>10</sup>; **(London):** Carolina A Braga Marcano<sup>38</sup>, Beverley Burke<sup>38</sup>, Richard Dobson<sup>38</sup>, Johannie Gungadoo<sup>38</sup>, Kate L Lee<sup>38</sup>, Patricia B Munroe<sup>38</sup>, Stephen J Newhouse<sup>38</sup>, Abiodun Onipinla<sup>38</sup>, Chris Wallace<sup>38</sup>, Mingzhan Xue<sup>38</sup>, Mark Caulfield<sup>38</sup>; **(Oxford):** Martin Farrall<sup>39</sup>

**Rheumatoid Arthritis:** Anne Barton<sup>40</sup>, The Biologics in RA Genetics and Genomics Study Syndicate (BRAGGS) Steering Committee\*, Ian N Bruce<sup>40</sup>, Hannah Donovan<sup>40</sup>, Steve Eyre<sup>40</sup>, Paul D Gilbert<sup>40</sup>, Samantha L Hider<sup>40</sup>, Anne

M Hinks<sup>40</sup>, Sally L John<sup>40</sup>, Catherine Potter<sup>40</sup>, Alan J Silman<sup>40</sup>, Deborah PM Symmons<sup>40</sup>, Wendy Thomson<sup>40</sup>, Jane Worthington<sup>40</sup>

**Type 1 Diabetes:** David G Clayton<sup>2</sup>, David B Dunger<sup>2,41</sup>, Sarah Nutland<sup>2</sup>, Helen E Stevens<sup>2</sup>, Neil M Walker<sup>2</sup>, Barry Widmer<sup>2,41</sup>, John A Todd<sup>2</sup>

**Type 2 Diabetes (Exeter):** Timothy M Frayling<sup>42,43</sup>, Rachel M Freathy<sup>42,43</sup>, Hana Lango<sup>42,43</sup>, John R B Perry<sup>42,43</sup>, Beverley M Shields<sup>43</sup>, Michael N Weedon<sup>42,43</sup>, Andrew T Hattersley<sup>42,43</sup>; **(London):** Graham A Hitman<sup>44</sup>; **(Newcastle):** Mark Walker<sup>45</sup>; **(Oxford):** Kate S Elliott<sup>3,7</sup>, Christopher J Groves<sup>7</sup>, Cecilia M Lindgren<sup>3,7</sup>, Nigel W Rayner<sup>3,7</sup>, Nicholas J Timpson<sup>3,46</sup>, Eleftheria Zeggini<sup>3,7</sup>, Mark I McCarthy<sup>3,7</sup>

**Tuberculosis (Gambia):** Melanie Newport<sup>47</sup>, Giorgio Sirugo<sup>47</sup>; **(Oxford):** Emily Lyons<sup>3</sup>, Fredrik Vannberg<sup>3</sup>, Adrian VS Hill<sup>3</sup>

**Ankylosing Spondylitis:** Linda A Bradbury<sup>48</sup>, Claire Farrar<sup>49</sup>, Jennifer J Pointon<sup>48</sup>, Paul Wordsworth<sup>49</sup>, Matthew A Brown<sup>48,49</sup>

**Autoimmune Thyroid Disease:** Jayne A Franklyn<sup>50</sup>, Joanne M Heward<sup>50</sup>, Matthew J Simmonds<sup>50</sup>, Stephen CL Gough<sup>50</sup>

**Breast Cancer:** Sheila Seal<sup>51</sup>, Breast Cancer Susceptibility Collaboration (UK)\*,

Michael R Stratton<sup>51,52</sup>, Nazneen Rahman<sup>51</sup>

**Multiple Sclerosis:** Maria Ban<sup>53</sup>, An Goris<sup>53</sup>, Stephen J Sawcer<sup>53</sup>, Alastair Compston<sup>53</sup>

**Gambian Controls (Gambia):** David Conway<sup>47</sup>, Muminatou Jallow<sup>47</sup>, Melanie Newport<sup>47</sup>, Giorgio Sirugo<sup>47</sup>; **(Oxford):** Kirk A Rockett<sup>3</sup>, Dominic P Kwiatkowski<sup>3,5</sup>

**DNA, Genotyping, Data QC and Informatics (Wellcome Trust Sanger Institute, Hinxton):** Claire Bryan<sup>5</sup>, Suzannah J Bumpstead<sup>5</sup>, Amy Chaney<sup>5</sup>, Kate Downes<sup>2,5</sup>, Jilur Ghoris<sup>5</sup>, Rhian Gwilliam<sup>5</sup>, Sarah E Hunt<sup>5</sup>, Michael Inouye<sup>5</sup>, Andrew Keniry<sup>5</sup>, Emma King<sup>5</sup>, Ralph McGinnis<sup>5</sup>, Simon Potter<sup>5</sup>, Rathi Ravindrarajah<sup>5</sup>, Pamela Whittaker<sup>5</sup>, David Withers<sup>5</sup>, Panos Deloukas<sup>5</sup>; **(Cambridge):** Hin-Tak Leung<sup>2</sup>, Sarah Nutland<sup>2</sup>, Helen E Stevens<sup>2</sup>, Neil M Walker<sup>2</sup>, John A Todd<sup>2</sup>

**Statistics (Cambridge):** Doug Easton<sup>12</sup>, David G Clayton<sup>2</sup>; **(Leicester):** Paul R Burton<sup>1</sup>, Martin D Tobin<sup>1</sup>; **(Oxford):** Jeffrey C Barrett<sup>3</sup>, David Evans<sup>3</sup>, Andrew P Morris<sup>3</sup>, Lon R Cardon<sup>3</sup>; **(Oxford):** Niall J Cardin<sup>11</sup>, Dan Davison<sup>11</sup>, Teresa Ferreira<sup>11</sup>, Joanne Pereira-Gale<sup>11</sup>, Ingeleif B Hallgrimsdóttir<sup>11</sup>, Bryan N Howie<sup>11</sup>, Jonathan L Marchini<sup>11</sup>, Chris CA Spencer<sup>11</sup>, Zhan Su<sup>11</sup>, Yik Ying Teo<sup>3,11</sup>, Damjan Vukcevic<sup>11</sup>, Peter Donnelly<sup>11</sup>

**PIs:** David Bentley<sup>5,54</sup>, Matthew A Brown<sup>48,49</sup>, Lon R Cardon<sup>3</sup>, Mark Caulfield<sup>38</sup>, David G Clayton<sup>2</sup>, Alistair Compston<sup>53</sup>, Nick Craddock<sup>23</sup>, Panos Deloukas<sup>5</sup>, Peter Donnelly<sup>11</sup>, Martin Farrall<sup>39</sup>, Stephen CL Gough<sup>50</sup>, Alistair S Hall<sup>26</sup>, Andrew T Hattersley<sup>42,43</sup>, Adrian VS Hill<sup>3</sup>, Dominic P Kwiatkowski<sup>3,5</sup>, Christopher G Mathew<sup>29</sup>, Mark I McCarthy<sup>3,7</sup>, Willem H Ouwehand<sup>8,9</sup>, Miles Parkes<sup>27</sup>, Marcus Pembrey<sup>18,20</sup>, Nazneen Rahman<sup>51</sup>, Nilesh J Samani<sup>10</sup>, Michael R Stratton<sup>51,52</sup>, John A Todd<sup>2</sup>, Jane Worthington<sup>40</sup>

<sup>1</sup> Genetic Epidemiology Group, Department of Health Sciences, University of Leicester, Adrian Building, University Road, Leicester, LE1 7RH, UK; <sup>2</sup> Juvenile Diabetes Research Foundation/Wellcome Trust Diabetes and Inflammation Laboratory, Department of Medical Genetics, Cambridge Institute for Medical Research, University of Cambridge, Wellcome Trust/MRC Building, Cambridge, CB2 0XY, UK; <sup>3</sup> Wellcome Trust Centre for Human Genetics, University of Oxford, Roosevelt Drive, Oxford OX3 7BN, UK; <sup>4</sup> Department of Psychological Medicine, Henry Wellcome Building, School of Medicine, Cardiff University, Heath Park, Cardiff CF14 4XN, UK; <sup>5</sup> The Wellcome Trust Sanger Institute, Wellcome Trust

Genome Campus, Hinxton, Cambridge CB10 1SA, UK;<sup>6</sup> The Wellcome Trust, Gibbs Building, 215 Euston Road, London NW1 2BE, UK;<sup>7</sup> Oxford Centre for Diabetes, Endocrinology and Medicine, University of Oxford, Churchill Hospital, Oxford, OX3 7LJ, UK;<sup>8</sup> Department of Haematology, University of Cambridge, Long Road, Cambridge, CB2 2PT, UK;<sup>9</sup> National Health Service Blood and Transplant, Cambridge Centre, Long Road, Cambridge, CB2 2PT, UK;<sup>10</sup> Department of Cardiovascular Sciences, University of Leicester, Glenfield Hospital, Groby Road, Leicester, LE3 9QP, UK;<sup>11</sup> Department of Statistics, University of Oxford, 1 South Parks Road, Oxford OX1 3TG, UK;<sup>12</sup> Cancer Research UK Genetic Epidemiology Unit, Strangeways Research Laboratory, Worts Causeway, Cambridge CB1 8RN, UK;<sup>13</sup> National Health Service Blood and Transplant, Sheffield Centre, Longley Lane, Sheffield S5 7JN, UK;<sup>14</sup> National Health Service Blood and Transplant, Brentwood Centre, Crescent Drive, Brentwood, CM15 8DP, UK;<sup>15</sup> The Welsh Blood Service, Ely Valley Road, Talbot Green, Pontyclun, CF72 9WB, UK;<sup>16</sup> The Scottish National Blood Transfusion Service, Ellen's Glen Road, Edinburgh, EH17 7QT, UK;<sup>17</sup> National Health Service Blood and Transplant, Southampton Centre, Coxford Road, Southampton, SO16 5AF, UK;<sup>18</sup> Avon Longitudinal Study of Parents and Children, University of Bristol, 24 Tyndall Avenue, Bristol, BS8 1TQ, UK;<sup>19</sup> Division of Community Health Services, St George's University of London, Cranmer Terrace, London SW17 0RE, UK;<sup>20</sup> Institute of Child Health, University College London, 30 Guilford St, London WC1N 1EH, UK;<sup>21</sup> University of Aberdeen, Institute of Medical Sciences, Foresterhill, Aberdeen, AB25 2ZD, UK;<sup>22</sup> Department of Psychiatry, Division of Neuroscience, Birmingham University, Birmingham, B15 2QZ, UK;<sup>23</sup> Department of Psychological Medicine, Henry Wellcome Building, School of Medicine, Cardiff University, Heath Park, Cardiff CF14 4XN, UK;<sup>24</sup> SGDP, The Institute of Psychiatry, King's College London, De Crespigny Park Denmark Hill London SE5 8AF, UK;<sup>25</sup> School of Neurology, Neurobiology and Psychiatry, Royal Victoria Infirmary, Queen Victoria Road, Newcastle upon Tyne, NE1 4LP, UK;<sup>26</sup> LIGHT and LIMM Research Institutes, Faculty of Medicine and Health, University of Leeds, Leeds, LS1 3EX, UK;<sup>27</sup> IBD Research Group, Addenbrooke's Hospital, University of Cambridge, Cambridge, CB2 2QQ, UK;<sup>28</sup> Gastrointestinal Unit, School of Molecular and Clinical Medicine, University of Edinburgh, Western General Hospital, Edinburgh EH4 2XU UK;<sup>29</sup> Department of Medical & Molecular Genetics, King's College London School of Medicine, 8th Floor Guy's Tower, Guy's Hospital, London, SE1 9RT, UK;<sup>30</sup> Institute for Digestive Diseases, University College London Hospitals Trust, London, NW1 2BU, UK;<sup>31</sup> Department of Gastroenterology, Guy's and St Thomas' NHS Foundation Trust, London, SE1 7EH, UK;<sup>32</sup> Department of Gastroenterology & Hepatology, University of Newcastle upon Tyne, Royal Victoria Infirmary, Newcastle upon Tyne, NE1 4LP, UK;<sup>33</sup> Gastroenterology Unit, Radcliffe Infirmary, University of Oxford, Oxford, OX2 6HE, UK;<sup>34</sup> Medicine and Therapeutics, Aberdeen Royal Infirmary, Foresterhill, Aberdeen, Grampian AB9 2ZB, UK;<sup>35</sup> Clinical Pharmacology Unit and the Diabetes and Inflammation Laboratory, University of Cambridge, Addenbrookes Hospital, Hills Road, Cambridge CB2 2QQ, UK;<sup>36</sup> Centre National de Genotypage, 2, Rue Gaston Cremieux, Evry, Paris 91057.;<sup>37</sup> BHF Glasgow Cardiovascular Research Centre, University of Glasgow, 126 University Place, Glasgow, G12 8TA, UK;<sup>38</sup> Clinical Pharmacology and Barts and The London Genome Centre, William Harvey Research Institute, Barts and The London, Queen Mary's School of Medicine, Charterhouse Square, London EC1M 6BQ, UK;<sup>39</sup> Cardiovascular Medicine, University of Oxford, Wellcome Trust Centre for Human Genetics, Roosevelt Drive, Oxford OX3 7BN, UK;<sup>40</sup> arc Epidemiology Research Unit, University of Manchester, Stopford Building, Oxford Rd, Manchester, M13 9PT, UK;<sup>41</sup> Department of Paediatrics, University of Cambridge, Addenbrooke's Hospital, Cambridge, CB2 2QQ, UK;<sup>42</sup> Genetics of Complex Traits, Institute of Biomedical and Clinical Science, Peninsula Medical School, Magdalen Road, Exeter EX1 2LU UK;<sup>43</sup> Diabetes Genetics, Institute of Biomedical and Clinical Science, Peninsula Medical School, Barrack Road, Exeter EX2 5DU UK;<sup>44</sup> Centre for Diabetes and Metabolic Medicine, Barts and The London, Royal London Hospital, Whitechapel, London, E1 1BB UK;<sup>45</sup> Diabetes Research Group, School of Clinical Medical Sciences, Newcastle University, Framlington Place, Newcastle upon Tyne NE2 4HH, UK;<sup>46</sup> The MRC Centre for Causal Analyses in Translational Epidemiology, Bristol University, Canynge Hall, Whiteladies Rd, Bristol BS2 8PR, UK;<sup>47</sup> MRC Laboratories, Fajara, The Gambia;<sup>48</sup> Diamantina Institute for Cancer, Immunology and Metabolic Medicine, Princess Alexandra Hospital, University of Queensland, Woolloongabba, Qld 4102, Australia;<sup>49</sup> Botnar Research Centre, University of Oxford, Headington, Oxford OX3 7BN, UK;<sup>50</sup> Department of Medicine, Division of Medical Sciences, Institute of Biomedical Research, University of Birmingham, Edgbaston, Birmingham B15 2TT, UK;<sup>51</sup> Section of Cancer Genetics, Institute of Cancer Research, 15 Cotswold Road, Sutton, SM2 5NG, UK;<sup>52</sup> Cancer Genome Project, The Wellcome Trust Sanger Institute, Wellcome Trust Genome Campus, Hinxton, Cambridge CB10 1SA, UK;<sup>53</sup> Department of Clinical Neurosciences, University of Cambridge, Addenbrooke's Hospital, Hills Road, Cambridge CB2 2QQ, UK;<sup>54</sup> PRESENT ADDRESS: Illumina Cambridge, Chesterford Research Park, Little Chesterford, Nr Saffron Walden, Essex, CB10 1XL, UK.
